# Supplementary material for: The impact of Mycoplasma pneumoniae infection on children with immune thrombocytopenia treated with thrombopoietin receptor agonists: a real-world study from China
Source: Research Square preprint supplement (doi:10.21203/rs.3.rs-4996104/v1), 2024-10-07
Supplement: Supplementary file 1 [file f696ad3c35c7670c0c24f06c.docx]

Table 1. Demographic and clinical characteristics of ITP patients infected with M.Pneumonia

| Contents | ALL  (n=33) | platelet-increasing  group (n=12) | platelet-decreasing  group (n=21) | *p* |
| --- | --- | --- | --- | --- |
| Age, years, [IQR] | 7.69(4.94,10.99) | 6.96(4.45,9.49) | 8.68(5.66,11.79) | 0.33 |
| Male, n (%) | 21 (63.63) | 7 (58.33) | 14 (66.66) | 0.16 |
| Time from diagnosis to MP, months, [IQR] | 14.36(3.72,26.98) | 15.81(4.49,31.63) | 14.37(2.97,23.90) | 0.42 |
| Time from TPO-RA treatment to MP,  months, [IQR] | 8.5(3.99,15.78) | 4.93(1.75,12.33) | 12.47(5.86,16.54) | 0.12 |
| Baseline PLT, ×109/L, [IQR] | 128 (87.5,203.5) | 129(94.5,182.5) | 126(85,212) | 0.82 |
| PLT at MP infection, ×109/L, [IQR] | 142 (32,227.5) | 285.5(157.5,501) | 71(22.5,159) | <0.001 |
| Intervention/rescue treatment, n (%) | 6 (18.18) | 0 ) | 6 (28.57) | - |
| Type of ITP |  |  |  |  |
| pITP, n (%) | 8 |  |  |  |
| cITP, n (%) | 25 |  |  |  |
| Type of treatment, n (%) |  |  |  | <0.001 |
| Eltrombopag | 18 (54.54) | 3 (9.09) | 15 (45.45) | - |
| Avatrombopag | 12 (36.36) | 9 (27.27) | 3 (9.09) |  |
| Hetrombopag | 2 (6.06) | 2 (6.06) | 0 |  |
| Romiplostim | 1 (3.03) | 1 (3.03) | 0 |  |

Abbreviations: IQR, interquartile range; MP, mycoplasma pneumoniae; ITP, immune thrombocytopenia; pITP, persistent ITP; cITP, chronic ITP; PLT, platelet count; TPO-RAs, thrombopoietin receptor agonists.
